# Supplementary material for: Identification and characterization of the mitochondrial RNA polymerase and transcription factor in the fission yeast Schizosaccharomyces pombe
Source: PubMed Central journal article supplement — Nucleic Acids Res. 2011 Feb 26;39(12):5119–30. doi: 10.1093/nar/gkr103 (PMC3130274; doi:10.1093/nar/gkr103), 2011-02-26
Supplement: supp_gkr103_Supplementary_figure_1.pdf [file supp_gkr103_Supplementary_figure_1.pdf]

## Supplementary Figure 1

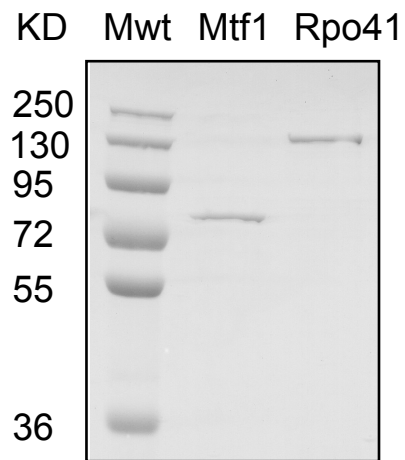

### Supplementary Figure 1

Purity of components for *in vitro* transcription.

(A) SDS-PAGE gels stained with Coomassie blue showing the purified Mtf1 and Rpo41 for EMSA and for *in vitro* transcription.
